# Supplementary material for: Methylome analysis of extreme chemoresponsive patients identifies novel markers of platinum sensitivity in high-grade serous ovarian cancer
Source: PubMed Central journal article supplement (PMC5481993; doi:10.1186/s12916-017-0870-0), 2017-06-23
Supplement: 12916_2017_870_MOESM3_ESM.pdf [file 12916_2017_870_MOESM3_ESM.pdf]

**Figure S1**

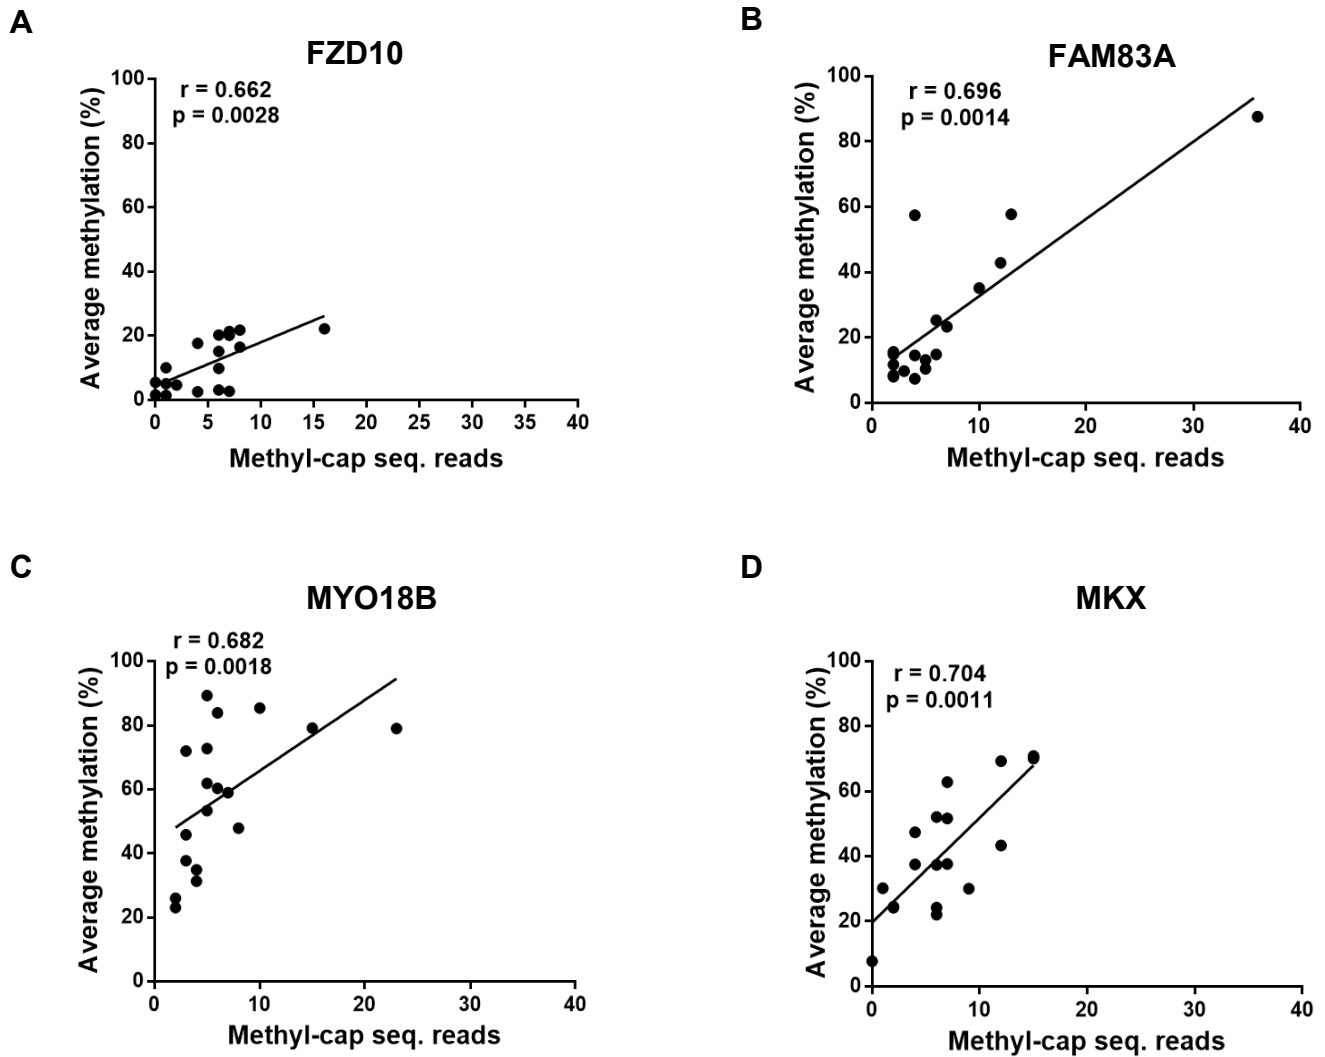

**Figure S1.** Spearman correlation of MethylCap-seq reads and methylation percentage obtained with bisulfite pyrosequencing for **A) FZD10**, **B) FAM83A**, **C) MYO18B** and **D) MKX** showing successful verification of MethylCap-seq data by pyrosequencing for discovery set 1 (n=18).

Figure S2

A

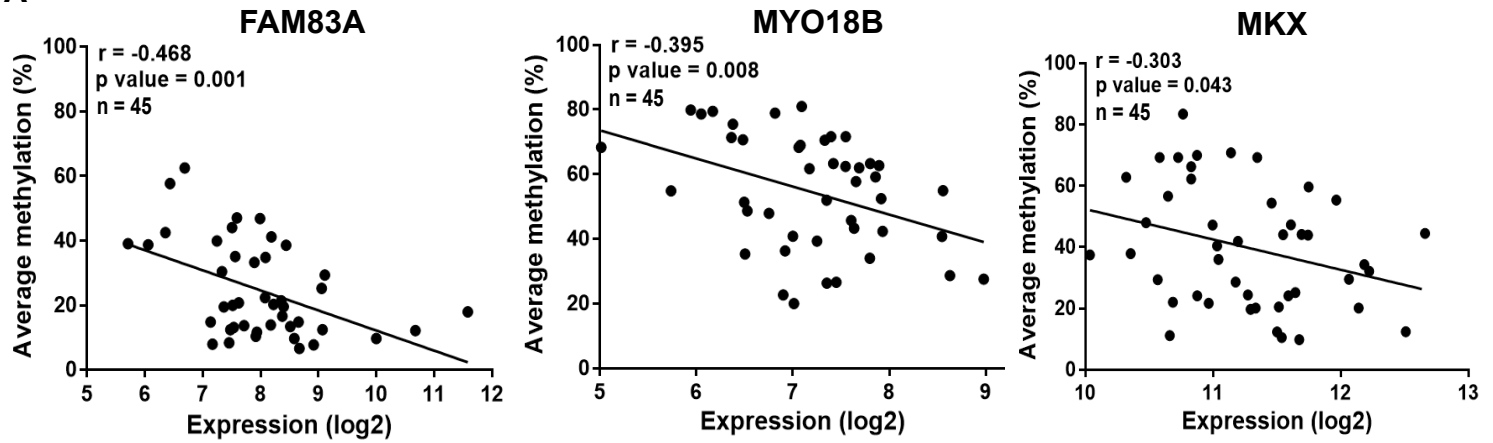

B

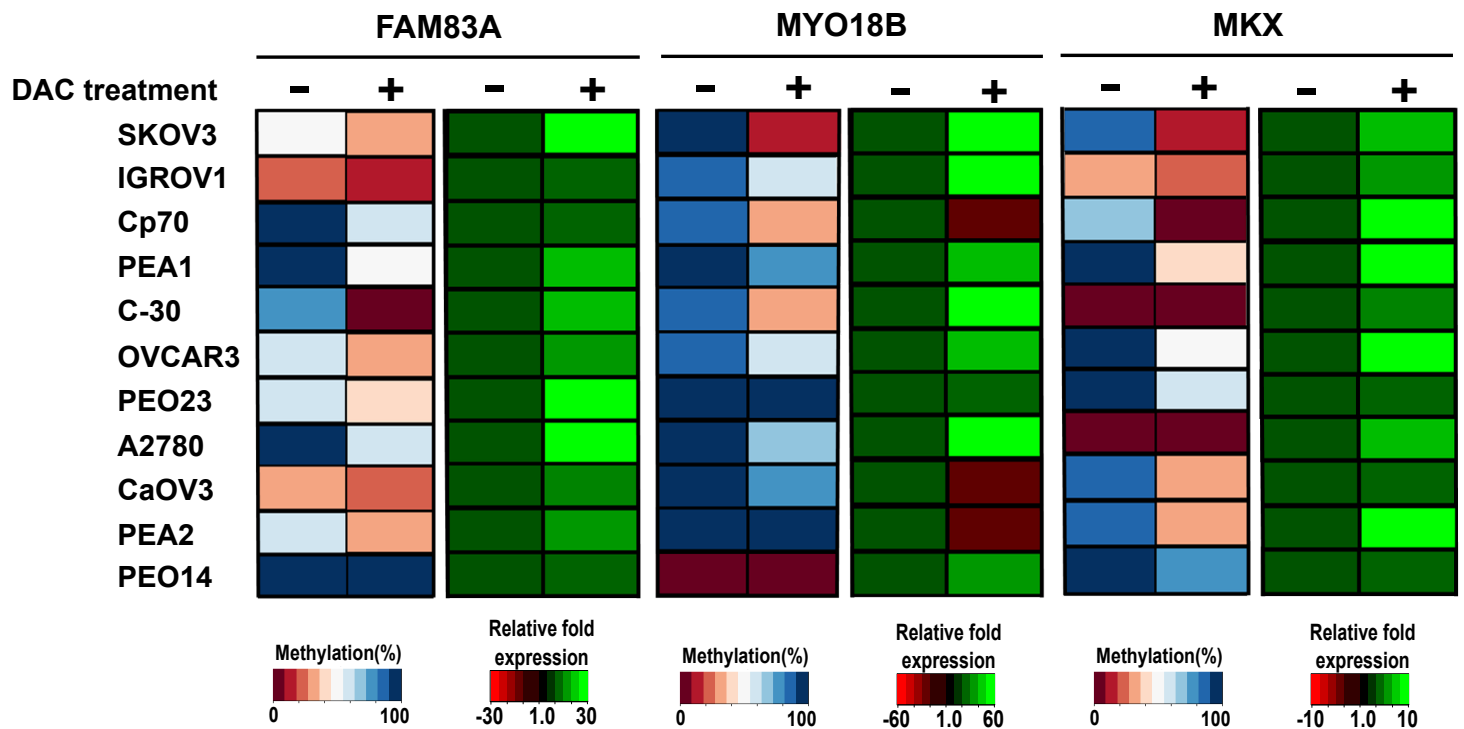

**Figure S2. A)** Correlation analysis of average methylation as determined by bisulfite pyrosequencing and microarray-based expression levels [18] of *FAM83A*, *MYO18B* and *MKX* in HGSOC patients (n=45) showing a significant inverse correlation between methylation and their correspondent expression using Pearson correlation testing. **B)** Heat maps of average methylation percentage and relative mRNA expression of *FAM83A*, *MYO18B* and *MKX* in various ovarian cancer cell lines (n=11), treated with or without demethylating agent 5-aza-2'-deoxycytidine (DAC) for 72 hrs (DAC + or -) showing demethylation (from blue to dark red) in most of the cell lines with subsequent upregulation of mRNA (from black to green).

**Figure S3**

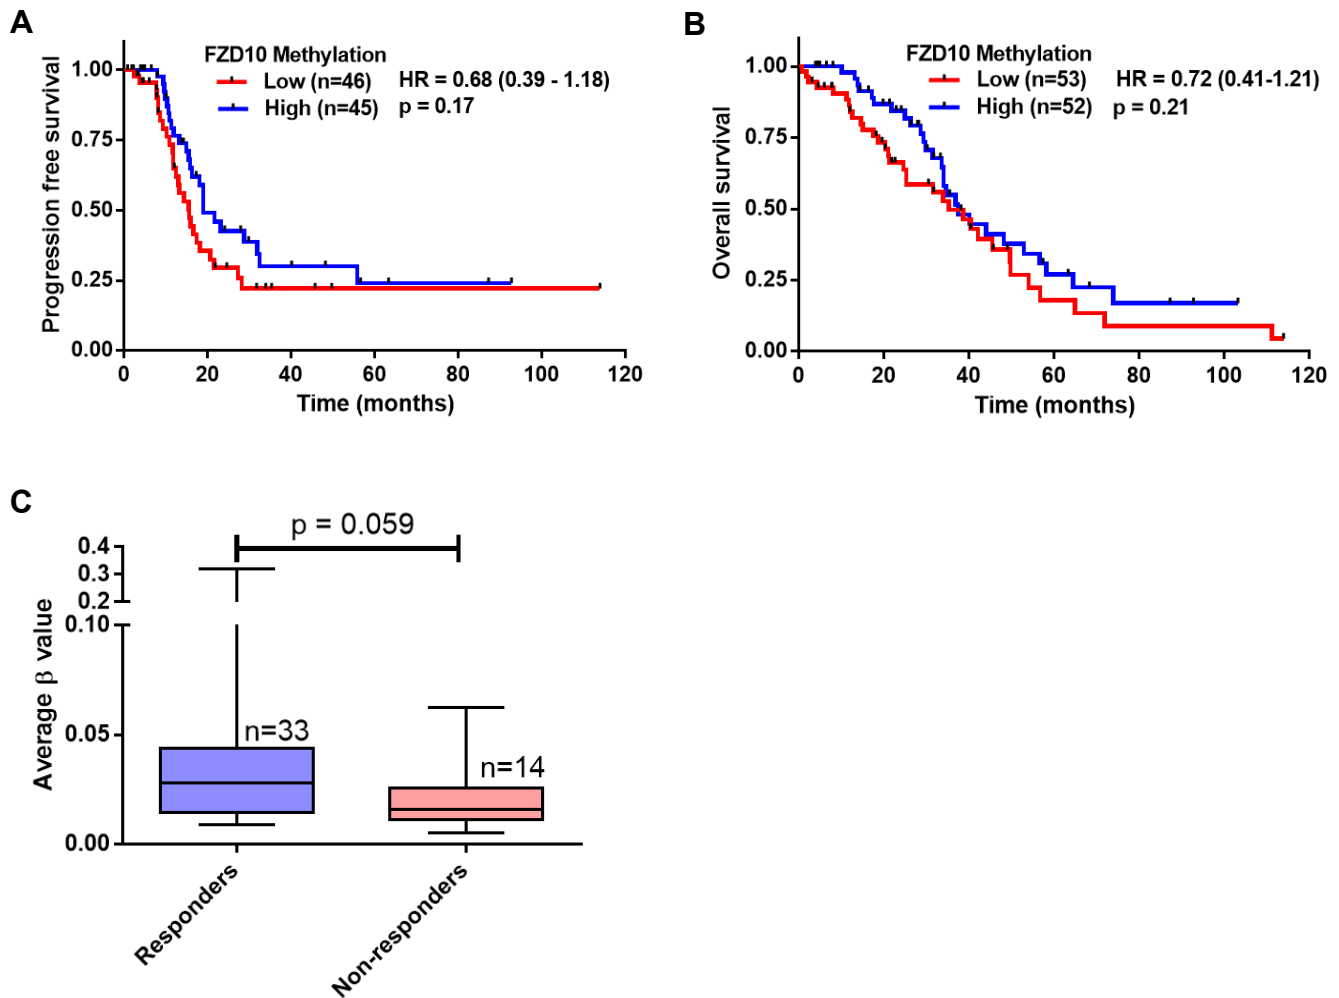

**Figure S3. A-B)** Kaplan–Meier plots showing PFS (**A**) and OS (**B**) for two user-defined patient groups based on *FZD10* methylation levels using univariate Mantel-Cox log-rank survival analysis on the HGSOc TCGA cohort (Set 5, n=91 and n=105, respectively). Average methylation  $\beta$ -value for ‘Low’ methylation group patients = 0.01 (0.01-0.02) and for ‘High’ methylation group patients = 0.06 (0.02-0.61). **C)** Average methylation  $\beta$ -value of *FZD10* in extreme responder (blue bars, n=33) and non-responder groups (red bars, n=14) of the TCGA cohort (Set 5) shows higher *FZD10* methylation in the extreme responder compared to the extreme non-responder group.

**Figure S4**

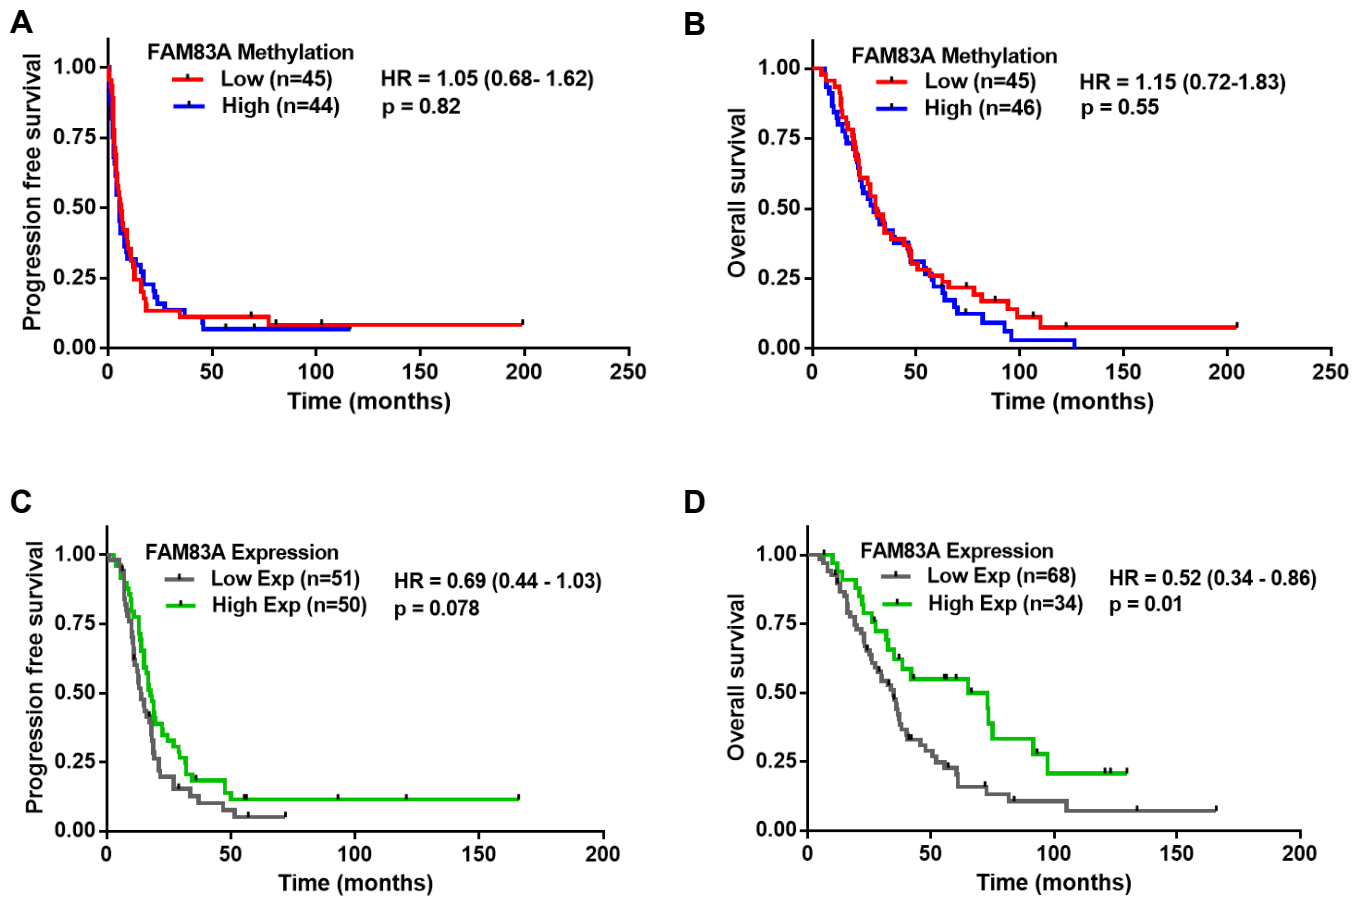

**Figure S4. A-B)** Kaplan–Meier plots showing PFS (A) and OS (B) for the two user-defined patient groups based on *FAM83A* methylation using univariate Mantel-Cox log-rank survival analysis in HGSOC cohorts (Set 4, n=89 and n=91, respectively). Average methylation  $\beta$ -value for ‘Low’ methylation group patients = 0.19 (0.07-0.29) and for ‘High’ methylation group patients = 0.36 (0.30-0.59). **C-D)** Kaplan–Meier plots showing PFS (C) and OS (D) for the two patient clusters based on *FAM83A* expression using univariate Mantel-Cox log-rank survival analysis in HGSOC cohorts (Set 6, n=101 and n=102, respectively).

**Figure S5**

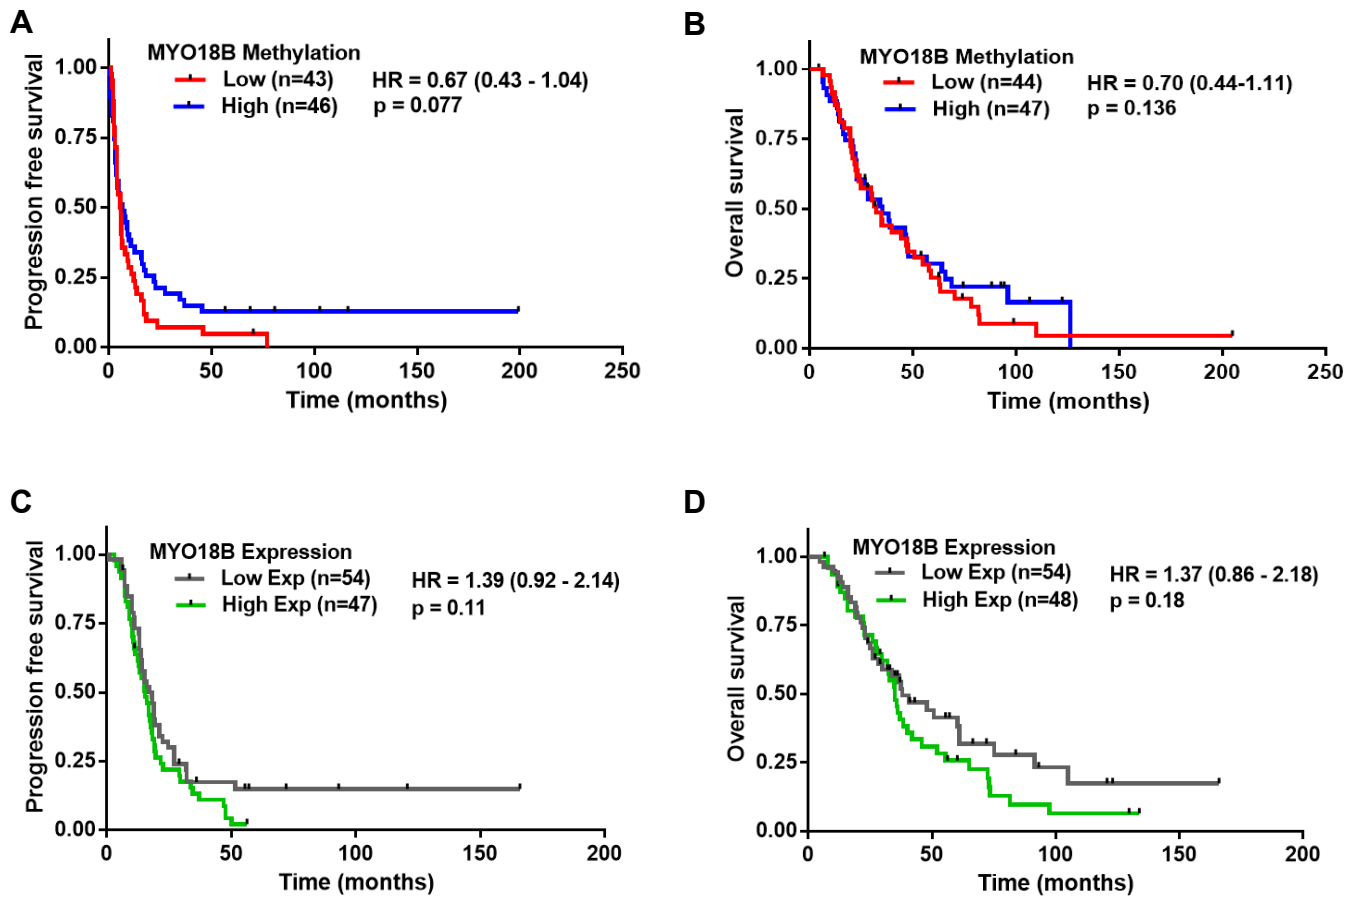

**Figure S5. A-B)** Kaplan–Meier plots showing PFS (A) and OS (B) for the two user-defined patient groups based on *MYO18B* methylation using univariate Mantel-Cox log-rank survival analysis in HGSOC cohorts (Set 4, n=89 and n=91, respectively). Average methylation  $\beta$ -value for ‘Low’ methylation group patients = 0.47 (0.25-0.57) and for ‘High’ methylation group patients = 0.66 (0.58-0.74). **C-D)** Kaplan–Meier plots showing PFS (C) and OS (D) for the two patient clusters based on *MYO18B* expression using univariate Mantel-Cox log-rank survival analysis in HGSOC cohorts (Set 6, n=101 and n=102, respectively).

**Figure S6**

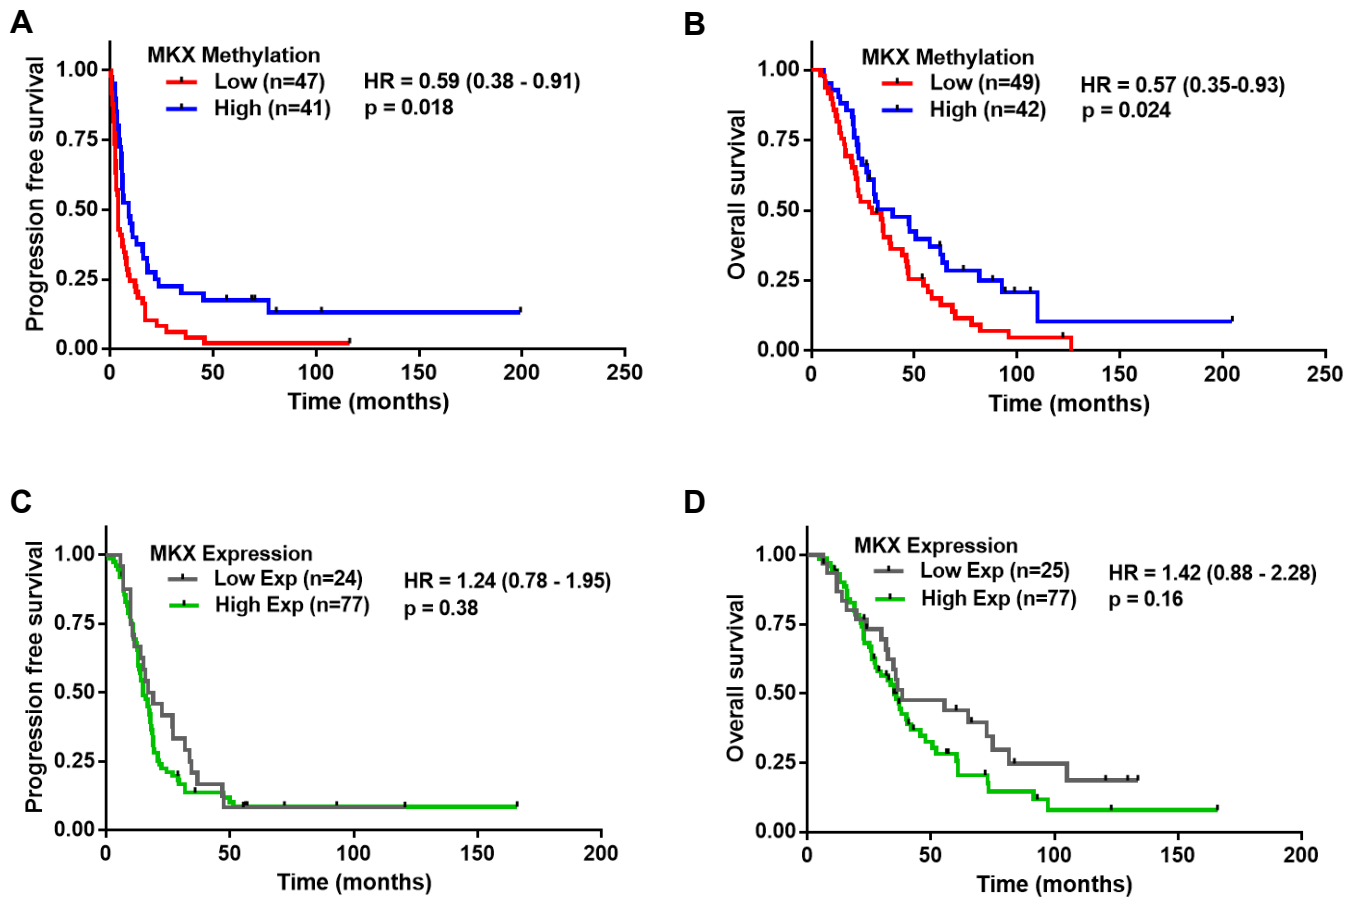

**Figure S6. A-B)** Kaplan–Meier plots showing PFS (A) and OS (B) for the two user-defined patient groups based on *MKX* methylation using univariate Mantel-Cox log-rank survival analysis in HGSOc cohorts (Set 4, n=89 and n=91, respectively). Average methylation  $\beta$ -value for ‘Low’ methylation group patients = 0.50 (0.17-0.65) and for ‘High’ methylation group patients = 0.74 (0.66-0.85). **C-D)** Kaplan–Meier plots showing PFS (C) and OS (D) for the two patient clusters based on *MKX* expression using univariate Mantel-Cox log-rank survival analysis in HGSOc cohorts (Set 6, n=101 and n=102, respectively).

**Figure S7**

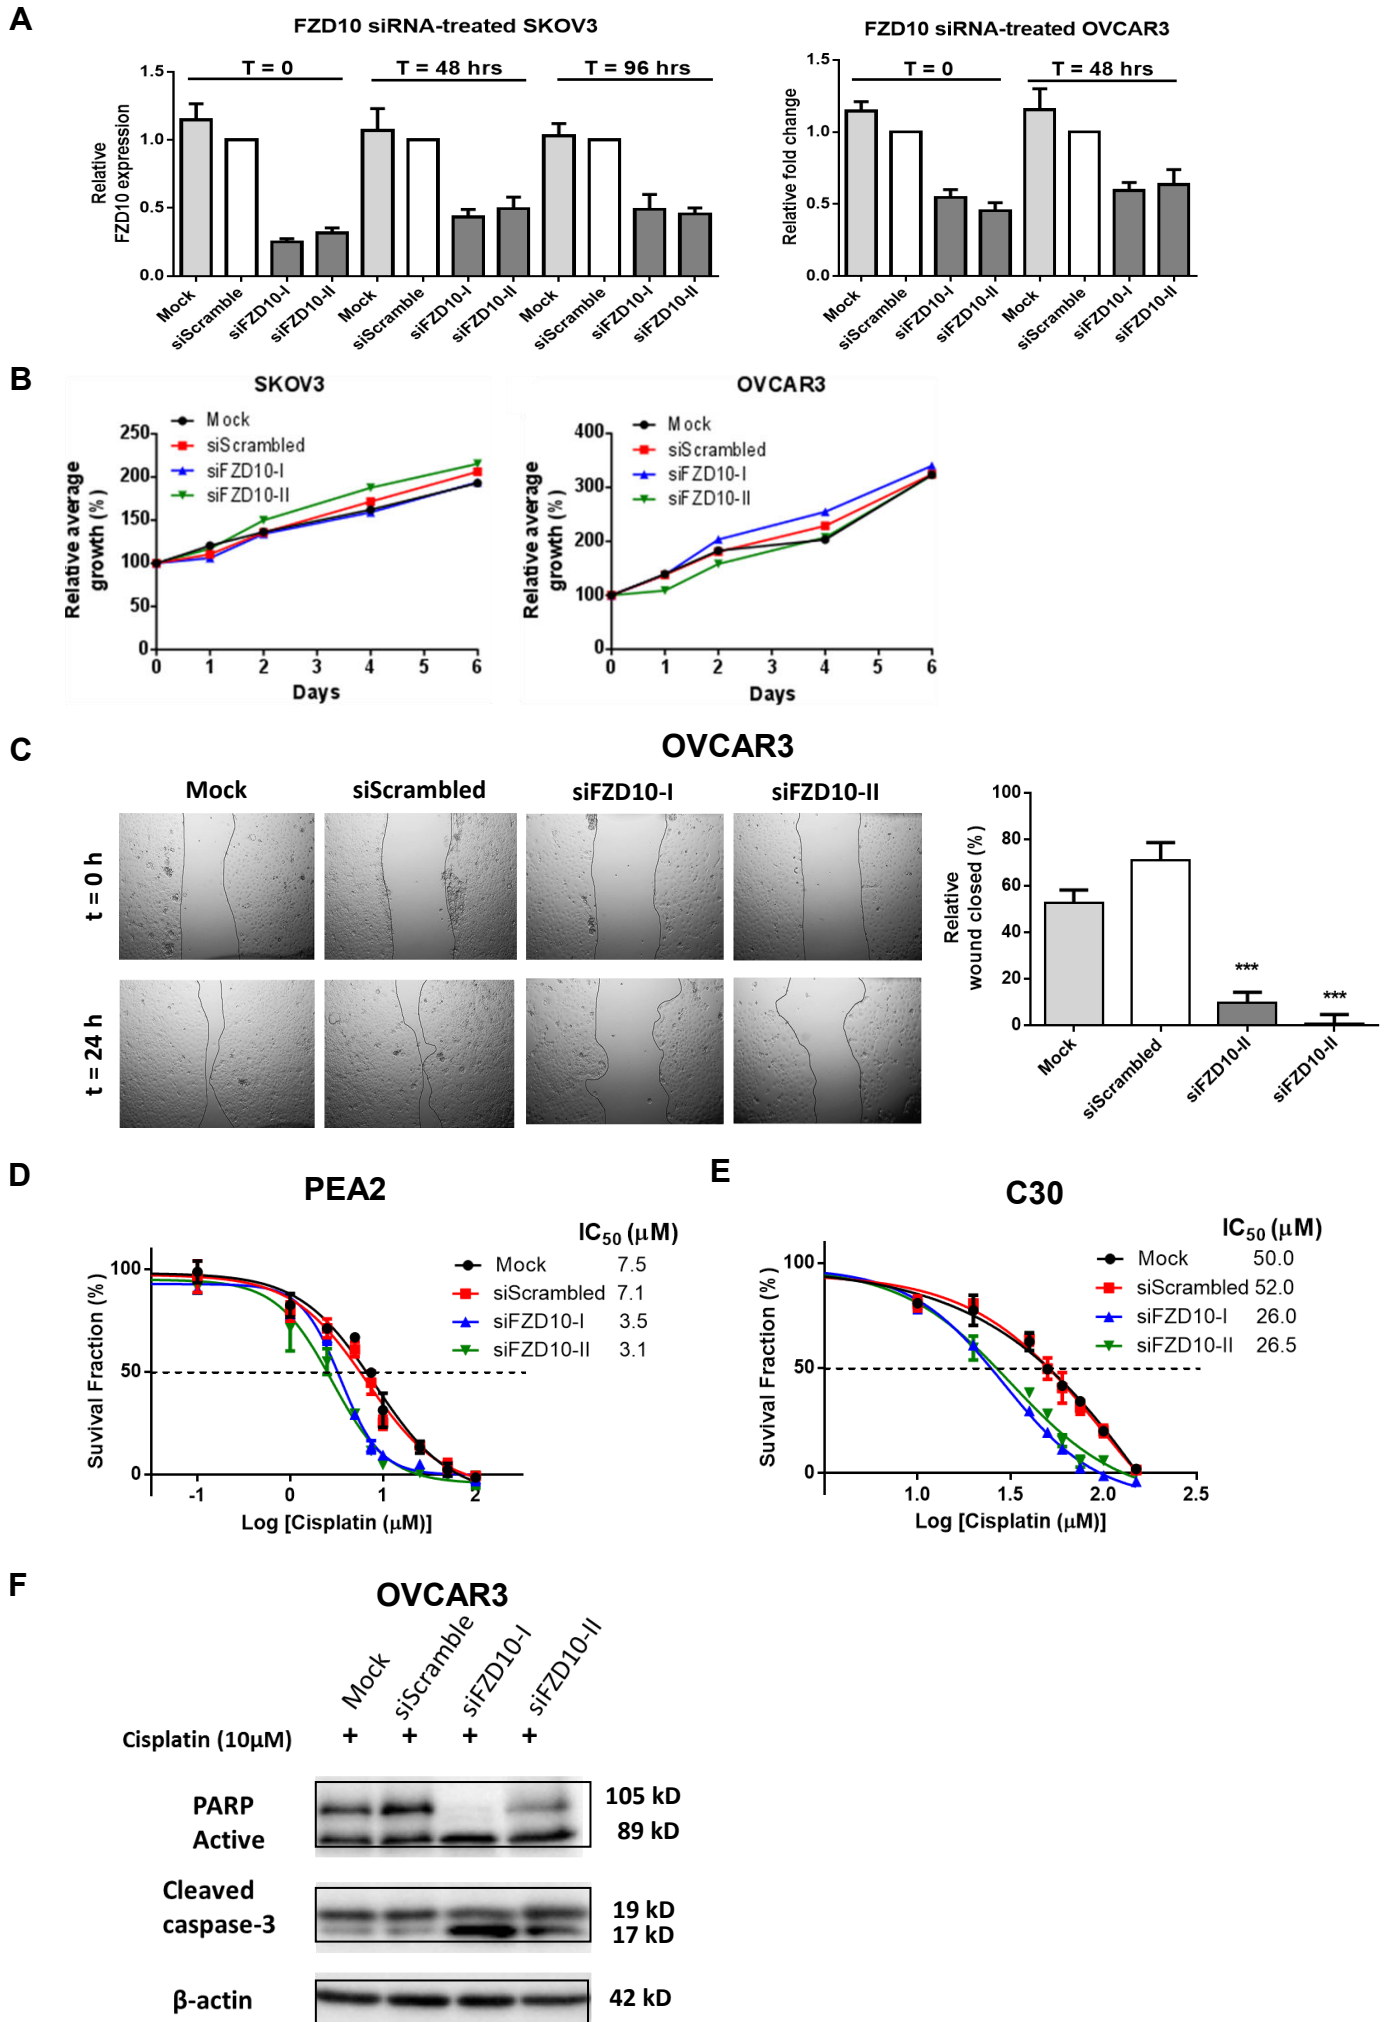

**Figure S7. A)** Relative mRNA expression of *FZD10* in SKOV3 and OVCAR3 cells treated with non-targeted scrambled siRNA (siScrambled) or two *FZD10* targeted siRNAs (siFZD10-I and siFZD10-II), after 48 hrs of transfection (T=0), after 48 hrs of replating of siRNAs-treated cells (T=48 hrs) and after 96 hrs of replating (T=96 hrs). **B)** Growth curve of SKOV3 and OVCAR3 cells after treatment with siFZD10 in comparison to siScrambled or mock control over 6 days. **C)** Representative microphotographs (4x magnification) for wound healing assay on *FZD10* siRNAs treated OVCAR3 cells for T=0 and T=24 hrs, along with the quantification of relative wound. Each bar represents % of wound closed  $\pm$  SD from 3 independent experiments. \*\*\*  $p < 0.001$  for *FZD10* siRNAs treated cells in comparison to the siScrambled, by student t-test. **D-E)** Short term MTT survival assay on siRNA treated PEA-2 (**D**) and C-30 cells (**E**) in the presence of cisplatin at indicated concentration after 96 hrs. \*  $p < 0.05$ ; \*\*  $p < 0.01$  for siFZD10-I or siFZD10-II relative to scrambled control, Student t test. IC<sub>50</sub> were calculated and are shown for each group in the inset. **F)** Protein levels of cleaved PARP and caspase 3 in OVCAR3 cells transiently transfected with either *FZD10* siRNAs, along with treatment of cisplatin for 24 hrs for indicated concentrations.



**Figure S8**

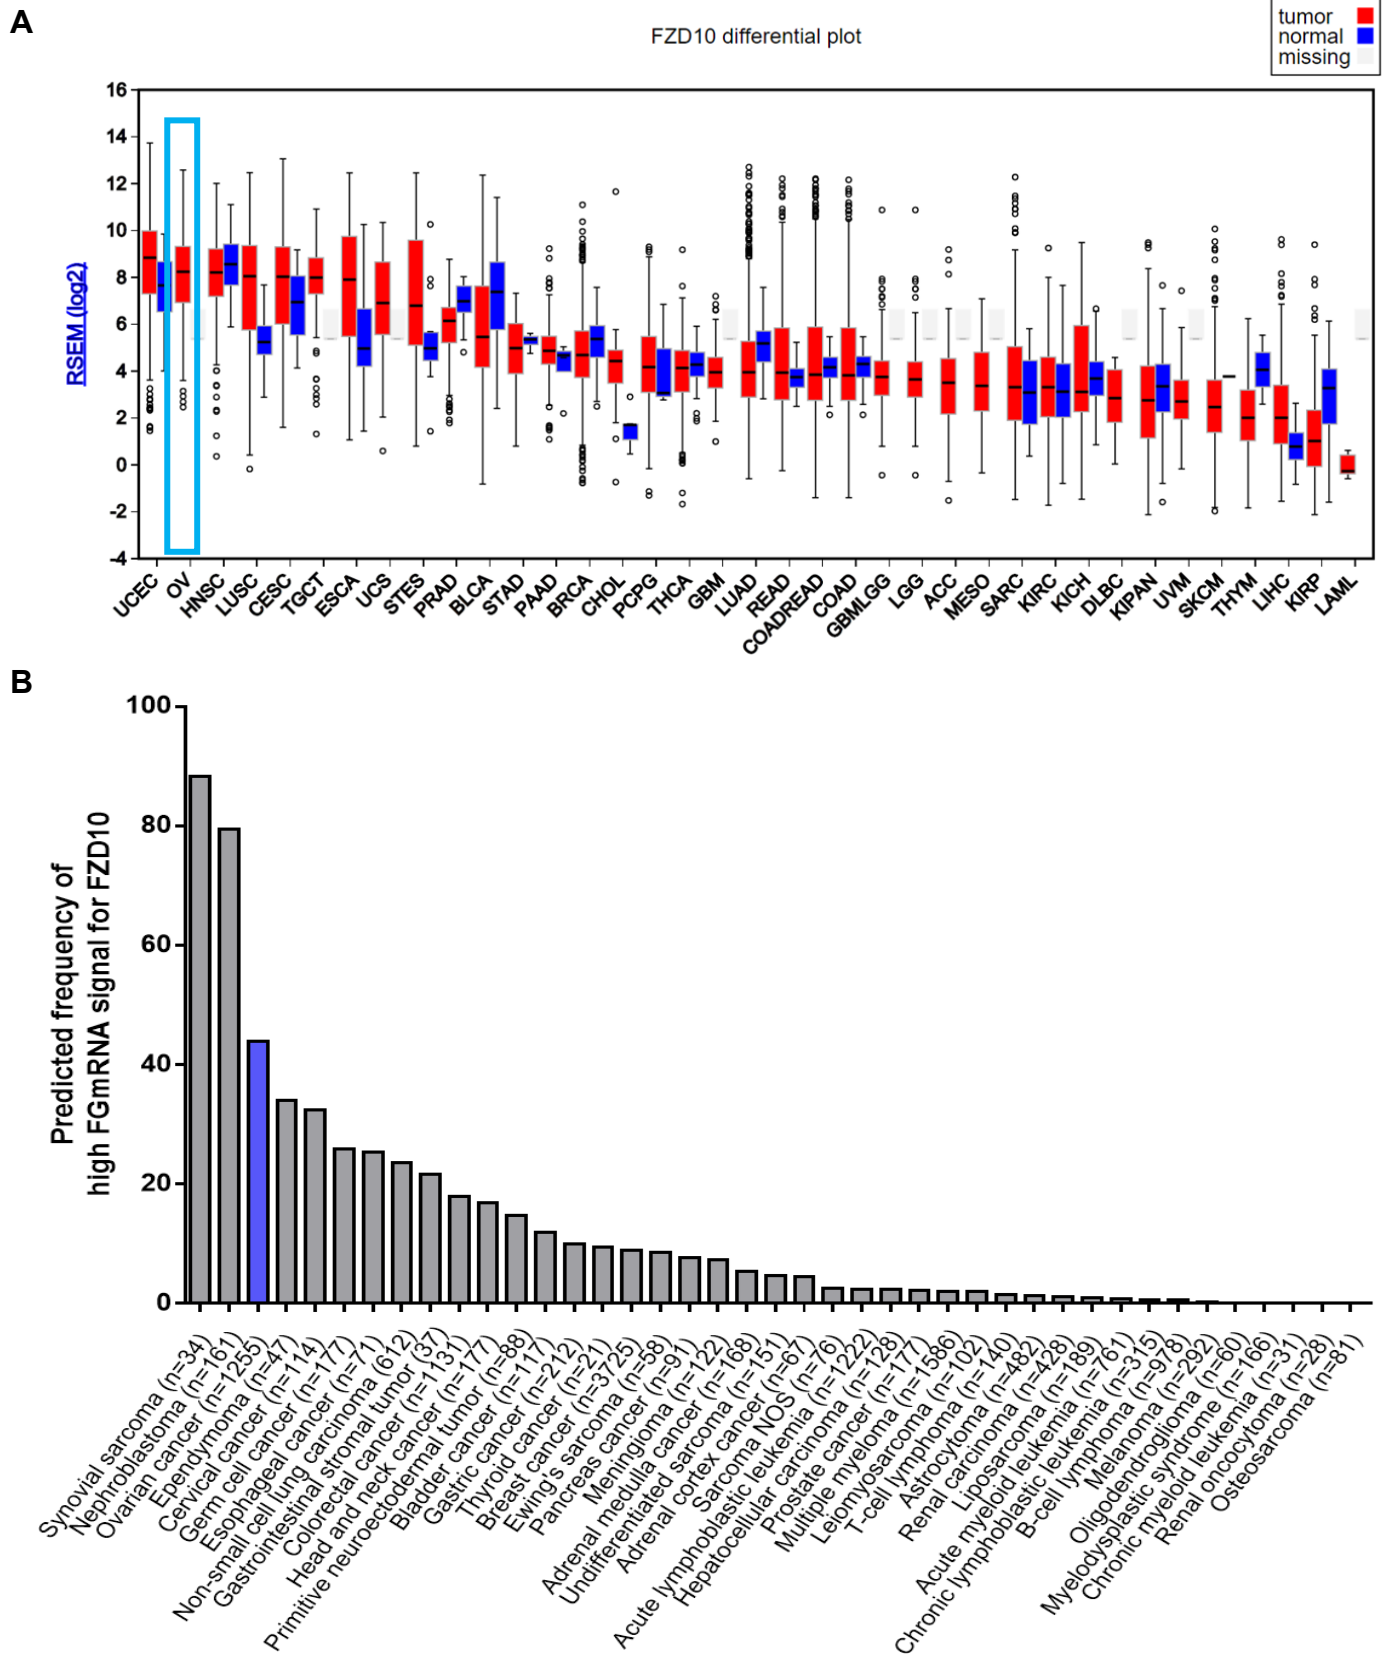

**Figure S8.** Global relative expression of *FZD10* (**A**) in different types of cancer based on the TCGA data\*. **B**) *FZD10* predicted high expression level calculated with FZD10 profiling [33] (see Material & Methods for details). The x-axis represents the percentage of samples per tumor type that show an overexpression of *FZD10*.

\*Marx V. Drilling into big cancer-genome data. Nat Methods 2013;10:293–7
