# Supplementary material for: Methylome analysis of extreme chemoresponsive patients identifies novel markers of platinum sensitivity in high-grade serous ovarian cancer
Source: BMC Med. 2017 Jun 23;15:116. doi: 10.1186/s12916-017-0870-0 (PMC5481993; doi:10.1186/s12916-017-0870-0)
Supplement: Supplementary file 5 — Top 45 genes (49 DMRs) for verification along with their MethylCap-seq data and corresponding expression data. (XLSX 40 kb) [file 12916_2017_870_MOESM5_ESM.xlsx]

## Sheet: Sheet1
										MethylCap-seq data (Set 1)																						Expression data (Set 2)
S.No	gene_label	gene_description	chr	beg	end	location	location_info	region_ID	middle_difference	R1	R2	R3	R4	R6	R8	R9	R10	NR1	NR2	NR3	NR4	NR5	NR6	NR7	NR8	NR9	NR10	Leuco 1	Leuco 2		gene_label	R1 MicroArray	R2 MicroArray	R3 MicroArray	R4 MicroArray	R6 MicroArray	R10 MicroArray	NR1 MicroArray	NR2 MicroArray	NR4 MicroArray	NR5 MicroArray	NR10 MicroArray
1	FZD10	Frizzled-10 Precursor (Fz-10)(hFz10)(FzE7)(CD350 antigen) [Source:UniProtKB/Swiss-Prot;Acc:Q9ULW2]	12	130647308	130647889	PROMOTOR	Exon1	7157895	567	8	7	6	7	16	6	7	1	1	4	1	6	2	0	0	4	8	6	3	0		FZD10	9.19588	9.05552	9.12414	8.65817	9.07517	8.54755	9.47876	9.87454	8.96955	10.0758	9.12537
2	FAM83A	Protein FAM83A (Tumor-specific gene expressed in prostate protein)(BJ-TSA-9) [Source:UniProtKB/Swiss-Prot;Acc:Q86UY5]	8	124194183	124194524	PROMOTOR		8339020	-399	6	5	5	2	3	4	2	2	6	2	4	2	13	7	36	12	4	10	7	7		FAM83A	9.05385	7.91618	7.53642	7.45676	10.0005	8.65317	8.13374	7.93377	7.16861	6.43394	7.56215
3	MYO18B	Myosin-XVIIIb [Source:UniProtKB/Swiss-Prot;Acc:Q8IUG5]	22	26137121	26137667	PROMOTOR		7744393	-726	9	3	6	6	9	8	13	3	10	9	11	22	7	16	37	10	14	4	7	6		MYO18B	9.55668	9.06849	9.05983	9.34561	9.88588	9.24339	10.8875	9.84561	9.30433	10.0611	10.2851
4	MKX	Homeobox protein Mohawk [Source:UniProtKB/Swiss-Prot;Acc:Q8IYA7]	10	28035769	28036205	PROMOTOR		6962285	-1209	4	15	6	15	12	7	6	7	2	4	6	6	1	7	0	9	12	2	1	1		MKX	10.0375	11.1408	10.8774	10.8763	11.3464	10.321	11.2731	11.6107	10.6861	12.141	11.5905
5	GLI3	Zinc finger protein GLI3 [Source:UniProtKB/Swiss-Prot;Acc:P10071]	7	42278759	42278840	PROMOTOR		8222974	-1331	0	2	1	0	2	0	0	3	2	2	8	2	5	6	0	4	1	3	5	2		GLI3	10.1386	9.23906	8.99473	9.13343	9.58126	9.88767	10.8531	10.0787	9.66971	10.3529	10.3695
6	TMIGD2	Transmembrane and immunoglobulin domain-containing protein 2 Precursor [Source:UniProtKB/Swiss-Prot;Acc:Q96BF3]	19	4302628	4303012	PROMOTOR		7478253	-392	5	2	4	1	3	3	0	2	6	5	5	2	11	7	6	6	3	2	4	4		TMIGD2	8.88903	8.83233	9.39569	8.76686	9.16716	8.87992	9.26953	9.55684	9.30437	9.47348	9.39818
7	TMEM40	Transmembrane protein 40 [Source:UniProtKB/Swiss-Prot;Acc:Q8WWA1]	3	12812368	12812794	PROMOTOR		7899073	-1625	8	7	3	12	4	10	7	4	8	6	10	9	16	13	22	8	15	10	8	5		TMEM40	7.6148	8.35451	7.93865	8.2975	7.65416	7.61777	8.47666	7.33162	8.56888	9.7368	10.0224
8	NEUROG3	Neurogenin-3 (Protein atonal homolog 5) [Source:UniProtKB/Swiss-Prot;Acc:Q9Y4Z2]	10	71332198	71332994	PROMOTOR	Exon1	6980005	398	5	3	18	3	20	9	11	2	5	7	1	11	0	1	0	1	6	0	1	2		NEUROG3	13.746	13.4594	13.3667	13.2078	14.1123	13.4308	15.8253	13.7217	13.4739	14.3552	15.7975
9	HOMER3	Homer protein homolog 3 (Homer-3) [Source:UniProtKB/Swiss-Prot;Acc:Q9NSC5]	19	19052587	19053166	PROMOTOR		7498220	-894	8	9	9	8	14	3	7	10	18	13	13	6	12	18	18	9	16	12	10	5		HOMER3	8.01887	8.53496	8.30424	8.22032	8.09233	8.60789	9.37287	8.1429	9.42677	8.56889	9.00334
10	ACTL6B	Actin-like protein 6B (53 kDa BRG1-associated factor B)(Actin-related protein Baf53b)(ArpNalpha) [Source:UniProtKB/Swiss-Prot;Acc:O94805]	7	100253445	100254302	PROMOTOR	Exon1	8252004	211	6	11	7	4	20	5	6	4	3	4	1	1	4	2	0	4	3	1	4	2		ACTL6B	6.28055	6.70409	6.35406	6.44284	7.85315	6.58648	7.06183	7.3307	7.1974	8.0517	7.65379
11	DCD	Dermcidin Precursor (Preproteolysin) [Contains Survival-promoting peptide;DCD-1] [Source:UniProtKB/Swiss-Prot;Acc:P81605]	12	55044165	55044233	PROMOTOR		7118924	-1922	4	1	3	2	1	3	2	3	3	7	7	8	5	9	12	4	2	5	4	2		DCD	6.23512	7.6417	7.39332	6.56069	6.36101	7.18382	7.6194	7.94902	7.64962	7.27498	7.34306
12	ACTL8	Actin-like protein 8 (Cancer/testis antigen 57)(CT57) [Source:UniProtKB/Swiss-Prot;Acc:Q9H568]	1	18081774	18082003	PROMOTOR	Exon1	7556295	81	9	16	18	19	2	9	11	17	3	4	6	0	2	10	1	12	8	10	12	8		ACTL8	7.32396	7.68298	6.97802	6.39694	6.89233	6.64816	7.87358	7.7922	7.57787	7.35825	9.471
13	LPIN1	Lipin-1 [Source:UniProtKB/Swiss-Prot;Acc:Q14693]	2	11863499	11863833	PROMOTOR		7783307	-809	5	5	3	5	6	5	4	4	6	4	3	6	8	12	23	15	14	8	5	6		LPIN1	11.3048	9.42999	10.2273	10.1427	9.46812	9.85563	10.3073	11.6825	11.5895	10.9636	11.1344
14	LZTR1	Leucine-zipper-like transcriptional regulator 1 (LZTR-1) [Source:UniProtKB/Swiss-Prot;Acc:Q8N653]	22	21331653	21332308	PROMOTOR		7739582	-1771	9	7	12	7	12	10	7	7	9	9	8	88	13	13	34	15	20	10	9	5		LZTR1	12.1611	11.9161	11.6546	11.3261	12.2336	11.3595	11.4843	11.6011	11.0449	10.8356	11.1216
15	MYO18B	Myosin-XVIIIb [Source:UniProtKB/Swiss-Prot;Acc:Q8IUG5]	22	26137668	26138102	PROMOTOR		7744394	-235	5	2	6	4	2	3	4	3	5	5	10	23	6	5	15	8	7	3	3	5		MYO18B	9.55668	9.06849	9.05983	9.34561	9.88588	9.24339	10.8875	9.84561	9.30433	10.0611	10.2851
16	RXRA	Retinoic acid receptor RXR-alpha (Retinoid X receptor alpha)(Nuclear receptor subfamily 2 group B member 1) [Source:UniProtKB/Swiss-Prot;Acc:P19793]	9	137209194	137209626	PROMOTOR	Exon1	8413219	466	6	2	2	1	1	1	2	2	8	5	5	1	7	7	12	5	2	4	7	4		RXRA	11.0325	10.3766	9.62382	10.0063	10.195	10.3325	10.5319	10.7844	11.3838	11.1898	10.4474
17	IL1RAPL1	X-linked interleukin-1 receptor accessory protein-like 1 Precursor (IL1RAPL-1)(Oligophrenin-4)(Three immunoglobulin domain-containing IL-1 receptor-related 2)(TIGIRR-2) [Source:UniProtKB/Swiss-Prot;Acc:Q9NZN1]	X	28604221	28604338	PROMOTOR		8428653	-1237	6	6	3	13	9	4	2	7	6	3	6	0	1	2	0	1	1	4	2	3		IL1RAPL1	7.26048	7.61899	6.90759	8.06923	8.23913	7.19906	6.67502	6.67569	5.89648	7.38298	6.76682
18	ZFP41	Zinc finger protein 41 homolog (Zfp-41) [Source:UniProtKB/Swiss-Prot;Acc:Q8N8Y5]	8	144328004	144328427	PROMOTOR		8352226	-894	8	19	12	52	16	30	12	21	15	14	8	8	1	13	30	8	15	5	1	2		ZFP41	9.3419	9.73746	11.0644	10.5944	9.50973	9.64097	9.16121	9.15392	9.76423	9.21902	9.26203
19	BIRC5	Baculoviral IAP repeat-containing protein 5 (Apoptosis inhibitor survivin)(Apoptosis inhibitor 4) [Source:UniProtKB/Swiss-Prot;Acc:O15392]	17	76208279	76208606	PROMOTOR		7427179	-1835	12	11	8	8	18	10	7	13	7	8	7	3	7	7	9	6	5	11	5	2		BIRC5	10.899	11.3389	11.5412	11.0954	11.8253	11.409	11.4656	10.0479	10.3612	9.93681	10.8773
20	PTK2	Focal adhesion kinase 1 (FADK 1)(EC 2.7.10.2)(pp125FAK)(Protein-tyrosine kinase 2) [Source:UniProtKB/Swiss-Prot;Acc:Q05397]	8	142012812	142013091	PROMOTOR		8348769	-1620	4	12	8	4	12	13	2	2	5	4	1	1	4	1	2	3	6	5	0	1		PTK2	7.18965	7.27515	6.97516	8.42961	7.32731	6.59896	6.79218	7.0745	6.90305	5.94147	6.18954
21	DENND3	DENN domain-containing protein 3 [Source:UniProtKB/Swiss-Prot;Acc:A2RUS2]	8	142136854	142137096	PROMOTOR		8348967	-1745	5	10	11	3	8	11	1	2	4	6	0	0	1	1	1	6	3	3	6	0		DENND3	9.94378	9.62396	9.42934	8.50337	8.98322	9.43596	9.7785	10.7637	9.85173	11.145	9.97874
22	NOL4	Nucleolar protein 4 (Nucleolar-localized protein) [Source:UniProtKB/Swiss-Prot;Acc:O94818]	18	31803261	31803458	PROMOTOR	Exon1	7450166	156	3	0	2	0	10	5	8	0	4	1	0	1	1	0	1	0	0	0	1	0		NOL4	7.65884	7.5495	8.94177	7.56984	7.48116	7.01342	7.25751	7.4312	6.69977	6.43341	6.61733
23	RYR2	Ryanodine receptor 2 (RYR-2)(RyR2)(hRYR-2)(Cardiac muscle-type ryanodine receptor)(Cardiac muscle ryanodine receptor-calcium release channel) [Source:UniProtKB/Swiss-Prot;Acc:Q92736]	1	237205478	237206351	PROMOTOR	Exon1	7660468	410	2	0	4	2	9	2	6	0	3	0	0	0	1	0	0	2	0	2	2	1		RYR2	8.36852	7.5708	6.95752	7.44338	8.26907	7.61073	8.39239	8.12419	7.86376	8.39311	8.99004
24	NCBP2	Nuclear cap-binding protein subunit 2 (20 kDa nuclear cap-binding protein)(NCBP 20 kDa subunit)(CBP20)(NCBP-interacting protein 1)(NIP1)(Cell proliferation-inducing gene 55 protein) [Source:UniProtKB/Swiss-Prot;Acc:P52298]	3	196671138	196671647	PROMOTOR		7975855	-1925	19	15	17	20	12	11	20	12	12	15	5	4	7	11	16	14	16	11	5	7		NCBP2	5.45423	3.9468	5.50352	6.49984	6.08842	4.34119	5.92038	6.13804	6.05515	6.34886	6.97486
25	OBSCN	Obscurin (EC 2.7.11.1)(Obscurin-myosin light chain kinase)(Obscurin-MLCK)(Obscurin-RhoGEF) [Source:UniProtKB/Swiss-Prot;Acc:Q5VST9]	1	228395144	228395600	PROMOTOR		7653247	-459	11	13	14	9	4	5	7	10	15	19	24	14	12	17	8	13	18	10	11	6		OBSCN	9.01014	8.9952	8.53416	8.19324	8.98574	8.92693	9.57095	10.3255	9.04293	9.54053	8.79739
26	MT1X	Metallothionein-1X (MT-1X)(Metallothionein-IX)(MT-IX) [Source:UniProtKB/Swiss-Prot;Acc:P80297]	16	56710375	56710690	PROMOTOR		7333525	431	4	1	4	5	1	1	1	3	5	4	5	2	9	5	7	6	2	6	10	4		MT1X	14.2452	14.9131	14.8909	14.7271	13.4072	15.9497	14.2361	13.2827	13.2668	13.4372	13.7955
27	PDCL2	Phosducin-like protein 2 [Source:UniProtKB/Swiss-Prot;Acc:Q8N4E4]	4	56457953	56458622	PROMOTOR	Exon1	8003661	92	11	18	9	23	21	16	5	7	9	10	1	5	19	10	3	15	6	6	11	8		PDCL2	7.02739	7.09037	6.72704	6.32317	7.63452	7.16148	7.52865	7.1104	7.39059	8.05733	8.33127
28	EMD	Emerin [Source:UniProtKB/Swiss-Prot;Acc:P50402]	X	153606908	153607461	PROMOTOR		8460100	-373	7	11	4	16	4	5	4	6	3	1	0	2	8	2	9	6	4	5	6	7		EMD	11.421	12.4819	11.6006	12.0403	12.5208	11.6529	11.2021	11.4567	11.453	11.5437	10.6196
29	ABTB1	Ankyrin repeat and BTB/POZ domain-containing protein 1 (Elongation factor 1A-binding protein) [Source:UniProtKB/Swiss-Prot;Acc:Q969K4]	3	127390016	127390763	PROMOTOR		7945205	-1389	19	13	14	22	22	13	4	10	23	14	19	19	12	30	39	20	31	19	13	10		ABTB1	9.3965	9.11053	9.13554	9.34865	8.0895	9.45532	9.89386	11.0441	9.83803	10.3678	9.30913
30	FDFT1	Squalene synthetase (SQS)(SS)(EC 2.5.1.21)(Farnesyl-diphosphate farnesyltransferase)(FPP:FPP farnesyltransferase) [Source:UniProtKB/Swiss-Prot;Acc:P37268]	8	11658816	11659117	PROMOTOR		8293955	-1198	6	6	10	2	4	7	8	4	2	3	2	0	5	3	3	8	2	6	5	3		FDFT1	12.85	14.0811	14.7734	14.0421	13.2771	13.5793	12.7431	13.5173	12.3662	12.8771	12.6952
31	TEX13B	Testis-expressed sequence 13B protein [Source:UniProtKB/Swiss-Prot;Acc:Q9BXU2]	X	107224539	107225127	PROMOTOR	Exon2	8447820	767	10	5	7	17	9	7	2	9	10	15	8	9	16	11	21	17	11	14	13	5		MSLN	11.5003	12.5506	9.65736	12.6815	9.18388	12.6863	12.4627	13.6149	15.0891	12.0129	11.8562
32	GLI3	Zinc finger protein GLI3 [Source:UniProtKB/Swiss-Prot;Acc:P10071]	7	42278356	42278594	PROMOTOR		8222973	-1006	8	2	3	3	8	2	2	2	4	5	10	11	7	22	4	6	7	3	3	6		GLI3	10.1386	9.23906	8.99473	9.13343	9.58126	9.88767	10.8531	10.0787	9.66971	10.3529	10.3695
33	FKBP8	FK506-binding protein 8 (EC 5.2.1.8)(Peptidyl-prolyl cis-trans isomerase)(PPIase)(Rotamase)(38 kDa FK506-binding protein)(hFKBP38)(FKBPR38) [Source:UniProtKB/Swiss-Prot;Acc:Q14318]	19	18655622	18656015	PROMOTOR		7497518	-1436	5	4	3	9	5	2	5	5	7	8	12	3	15	10	12	11	3	5	5	6		FKBP8	10.6683	11.081	12.0542	10.8563	9.72871	11.7736	12.9085	12.3993	12.3819	10.9984	11.8359
34	TCIRG1	V-type proton ATPase 116 kDa subunit a isoform 3 (V-ATPase 116 kDa isoform a3)(Vacuolar proton translocating ATPase 116 kDa subunit a isoform 3)(Osteoclastic proton pump 116 kDa subunit)(OC-116 kDa)(OC116)(T-cell immune regulator 1)(T-cell immune response cDNA7 protein)(TIRC7) [Source:UniProtKB/Swiss-Prot;Acc:Q13488]	11	67804000	67804693	PROMOTOR		7056622	-2137	15	10	17	26	19	14	18	10	12	14	7	9	10	14	22	12	11	11	4	3		TCIRG1	10.1819	9.60559	9.88143	9.82466	9.79312	10.3326	10.6989	11.8668	10.1531	10.62	9.9023
35	FMOD	Fibromodulin Precursor (FM)(Collagen-binding 59 kDa protein)(Keratan sulfate proteoglycan fibromodulin)(KSPG fibromodulin) [Source:UniProtKB/Swiss-Prot;Acc:Q06828]	1	203321170	203321520	PROMOTOR		7638384	-728	6	8	12	11	6	5	3	7	10	10	8	10	12	15	8	12	16	10	5	5		FMOD	12.6173	12.0294	11.3846	12.125	11.0203	10.8496	11.049	13.2634	14.8639	14.193	12.0748
36	FLOT2	Flotillin-2 (Epidermal surface antigen)(ESA) [Source:UniProtKB/Swiss-Prot;Acc:Q14254]	17	27225353	27225408	PROMOTOR		7385049	-666	1	4	2	2	2	3	1	2	4	1	3	2	10	7	6	5	6	3	2	0		FLOT2	11.5378	12.1158	12.4222	11.5852	10.7639	11.7518	12.2904	12.8181	14.1441	12.6042	11.8924
37	HDAC5	Histone deacetylase 5 (HD5)(EC 3.5.1.98)(Antigen NY-CO-9) [Source:UniProtKB/Swiss-Prot;Acc:Q9UQL6]	17	42202158	42202700	PROMOTOR		7397929	-1415	10	6	6	9	9	9	4	5	9	8	4	10	11	16	16	16	18	7	7	12		HDAC5	9.44146	9.5519	10.6806	9.54477	8.92129	9.54889	9.91874	10.7913	10.6745	9.67389	10.4389
38	BDNF	Brain-derived neurotrophic factor Precursor (BDNF)(Abrineurin) [Source:UniProtKB/Swiss-Prot;Acc:P23560]	11	27743063	27743277	PROMOTOR	Exon1	7036699	435	7	6	7	1	16	7	2	5	7	0	1	5	1	1	4	2	7	2	2	1		BDNF	7.31501	7.39603	9.1493	7.51426	7.52404	7.43361	7.01967	7.27831	5.9627	7.4345	6.69399
39	TSPAN32	Tetraspanin-32 (Tspan-32)(Protein Phemx) [Source:UniProtKB/Swiss-Prot;Acc:Q96QS1]	11	2322826	2323083	PROMOTOR		7025641	-273	3	1	1	2	2	1	1	1	4	3	6	5	5	3	0	3	1	4	2	0		TSPAN32	7.90311	8.1369	8.28289	7.73392	7.56295	8.24798	8.41142	8.65179	10.0411	8.57414	8.33562
40	C16orf28	RING finger protein unkempt-like [Source:UniProtKB/Swiss-Prot;Acc:Q9H9P5]	16	1466224	1466453	PROMOTOR		7300162	-1639	5	4	7	2	2	4	5	2	10	4	3	3	10	8	5	10	9	8	3	5		C16orf28	7.29125	7.2204	6.13727	6.08529	7.29401	6.47701	7.45536	7.51471	7.76374	7.79863	6.78562
41	FAM83A	Protein FAM83A (Tumor-specific gene expressed in prostate protein)(BJ-TSA-9) [Source:UniProtKB/Swiss-Prot;Acc:Q86UY5]	8	124192670	124192936	PROMOTOR		8339017	-1949	18	17	21	25	15	30	19	12	19	19	14	8	12	19	21	12	17	10	6	3		FAM83A	9.05385	7.91618	7.53642	7.45676	10.0005	8.65317	8.13374	7.93377	7.16861	6.43394	7.56215
42	HDAC5	Histone deacetylase 5 (HD5)(EC 3.5.1.98)(Antigen NY-CO-9) [Source:UniProtKB/Swiss-Prot;Acc:Q9UQL6]	17	42202701	42202987	PROMOTOR		7397930	-1830	4	5	5	4	4	3	4	5	9	6	2	7	6	5	14	9	9	5	6	3		HDAC5	9.44146	9.5519	10.6806	9.54477	8.92129	9.54889	9.91874	10.7913	10.6745	9.67389	10.4389
43	GIPC1	PDZ domain-containing protein GIPC1 (RGS19-interacting protein 1)(GAIP C-terminus-interacting protein)(RGS-GAIP-interacting protein)(Tax interaction protein 2)(TIP-2) [Source:UniProtKB/Swiss-Prot;Acc:O14908]	19	14608851	14609207	PROMOTOR		7492142	-2085	11	8	23	14	10	7	2	8	15	8	10	20	18	30	15	17	15	13	7	3		GIPC1	12.5478	12.2718	13.1648	11.7395	11.1329	12.4076	13.53	13.8822	13.1872	11.6178	13.3899
44	OCEL1	Occludin/ELL domain-containing protein 1 [Source:UniProtKB/Swiss-Prot;Acc:Q9H607]	19	17335991	17336201	PROMOTOR		7495426	-959	1	1	3	1	2	2	3	1	4	6	5	2	4	4	11	1	1	3	4	5		OCEL1	9.34008	9.56011	9.33447	10.2716	8.27059	9.54207	11.5494	10.5669	10.4748	9.80535	9.98264
45	KIF27	Kinesin-like protein KIF27 [Source:UniProtKB/Swiss-Prot;Acc:Q86VH2]	9	86537703	86537996	PROMOTOR		8377097	-1508	11	15	9	10	13	7	5	12	6	4	6	4	8	15	12	11	5	7	10	11		KIF27	7.58757	7.38838	7.42117	6.65444	7.47882	7.27696	7.01157	6.83415	6.71039	6.54558	6.49092
46	FAM73B	Protein FAM73B [Source:UniProtKB/Swiss-Prot;Acc:Q7L4E1]	9	131797442	131798038	PROMOTOR		8405637	-1160	8	13	4	6	4	4	7	3	10	10	11	8	9	14	9	11	10	4	8	5		FAM73B	8.0442	8.21429	8.00817	7.20843	8.10124	8.22608	8.48138	8.44761	8.25647	9.21945	8.54317
47	PQLC3	PQ-loop repeat-containing protein 3 Precursor [Source:UniProtKB/Swiss-Prot;Acc:Q8N755]	2	11293718	11294045	PROMOTOR		7782737	-1443	8	4	3	6	5	5	5	7	5	3	4	9	6	12	23	10	15	9	6	6		PQLC3	10.847	10.7632	10.0623	10.6301	10.0393	10.9103	11.4824	10.9787	11.1835	11.4029	10.5376
48	PDIA6	Protein disulfide-isomerase A6 Precursor (EC 5.3.4.1)(Protein disulfide isomerase P5)(Thioredoxin domain-containing protein 7) [Source:UniProtKB/Swiss-Prot;Acc:Q15084]	2	10977532	10977694	PROMOTOR	Exon1	7782393	490	5	5	8	3	2	2	0	4	10	10	4	8	9	8	2	3	7	4	9	2		PDIA6	14.2931	14.4153	15.0899	14.2247	13.622	14.7156	14.5755	14.9684	15.5053	15.1346	14.9417
49	GJB6	Gap junction beta-6 protein (Connexin-30)(Cx30) [Source:UniProtKB/Swiss-Prot;Acc:O95452]	13	20807094	20807374	PROMOTOR		7163125	-700	8	6	6	5	7	3	4	5	5	10	11	3	10	12	14	10	6	6	8	9		GJB6	6.78407	6.90144	6.69602	5.98204	6.32335	6.89398	6.6458	7.2723	7.06956	7.00854	7.73049
